1  
2  
3  
4  
5  
6  
7  
8  
9  
10  
11  
12  
13  
14  
15  
16  
17  
18  
19  
20  
21  
22  
23  
24  
25  
26  
27

## Adolescent Stress Confers Resilience to Traumatic Stress Later in Life: Role of the Prefrontal Cortex

Cotella, E.M<sup>1,3\*</sup>; Nawreen, N<sup>1,2\*</sup>; Moloney, R.D<sup>1</sup>; Martelle, S.E<sup>1</sup>; Oshima, K.M<sup>1</sup>; Lemen, P<sup>1</sup>.  
NiBlack, J. N.<sup>1</sup>; Julakanti, R. R. <sup>1</sup>; Fitzgerald, M<sup>1</sup>. Baccei, M.L<sup>2,4</sup>.; Herman, J.P<sup>1,2,3</sup>.

\*Both authors contributed equally

1. Dept. of Pharmacology & Systems Physiology, University of Cincinnati, Cincinnati, Ohio 45237-0506, United States.

2. Neuroscience Graduate Program, University of Cincinnati, Cincinnati, Ohio 45237-0506, United States.

3. Veterans Affairs Medical Center, Cincinnati, Ohio 45221, United States.

4. Department of Anesthesiology, Pain Research Center, University of Cincinnati Medical Center, Cincinnati, OH, United States.

Corresponding Author: James P. Herman [james.herman@uc.edu](mailto:james.herman@uc.edu) Department of Pharmacology & Systems Physiology, University of Cincinnati, 231 Albert Sabin Way, Cincinnati, OH 45267-0576, USA

**Running title: Mechanisms of resilience after adolescent stress**

Keywords: INFRALIMBIC CORTEX, POST-TRAUMATIC STRESS DISORDER, CHRONIC VARIABLE STRESS, SINGLE PROLONGED STRESS, FEAR CONDITIONING INTRINSIC EXCITABILITY

28 **ABSTRACT:** Stress during adolescence is usually associated with psychopathology later in life.  
29 However, under certain circumstances, developmental stress can promote an adaptive  
30 phenotype, allowing individuals to cope better with adverse situations in adulthood, thereby  
31 contributing to resilience. The aim of the study was to understand how adolescent stress alters  
32 behavioral and physiological responses to traumatic stress in adulthood. Sprague Dawley rats  
33 were subjected to adolescent chronic variable stress (adol CVS) followed by single prolonged  
34 stress (SPS) in adulthood. One week after SPS, animals were tested for acquisition, extinction,  
35 extinction recall and reinstatement of auditory-cued fear conditioning, with neuronal  
36 recruitment during reinstatement assessed by Fos expression. Patch clamp electrophysiology  
37 was performed to examine physiological changes associated with resilience. We observed that  
38 adol CVS blocked SPS-induced impairment of extinction learning (males) and enhancement fear  
39 reinstatement (both sexes). SPS effects were associated with a reduction of infralimbic (IL)  
40 cortex neuronal recruitment after reinstatement in males and increased engagement of the  
41 central amygdala in females, both of which were also prevented by adol CVS. We explored the  
42 mechanism behind reduced IL recruitment in male rats by studying the intrinsic excitability of IL  
43 pyramidal neurons. SPS reduced excitability of IL neurons and prior adol CVS prevented this  
44 effect, indicating that adolescent stress can impart resilience to the effects of traumatic stress  
45 by modification of IL output in males. Overall, our study suggests that prior stress exposure can  
46 limit the impact of a subsequent severe stress exposure in adulthood, effects that are mediated  
47 by sex-specific modification of infralimbic and amygdala signaling.

48

49

50

51 **Introduction:**

52  
53 Understanding factors that affect the brain during adolescence has substantial health  
54 relevance, given the onset of numerous affective conditions during this developmental period  
55 (e.g., depression, anxiety disorders) (Andersen and Teicher, 2008; Kessler et al., 2005; Paus et  
56 al., 2008). In general, chronic stress during development is associated with the emergence of  
57 pathology, particularly when occurring during early life (de Kloet et al., 2005; Heim et al., 2008;  
58 Oitzl et al., 2010; Riboni and Belzung, 2017; Tost et al., 2015). However, mild to moderate stress  
59 during some development periods may also promote an adaptive response to adverse  
60 situations later in life, contributing to stress resilience (Ordoñez Sanchez et al., 2021; Ricon et  
61 al., 2012; Romeo, 2015; Schmidt, 2011; Southwick and Charney, 2012). Previous work from our  
62 lab indicates that chronic variable stress (CVS) during adolescence can evoke specific effects  
63 later in life that may determine either risk or resilience (Cotella et al., 2020, 2019). While the  
64 mechanisms implicated in developmental vulnerability to stress dysregulation are widely  
65 studied, resiliency after stress is poorly understood.

66  
67 Memories acquired under stressful situations are usually strongly consolidated and can be  
68 retrieved more easily than those acquired in neutral situations (Meir Drexler and Wolf, 2017).  
69 Prior exposure to stress can further enhance the acquisition and/or expression of the fear  
70 related behaviors (Blouin et al., 2016), processes linked to the prelimbic (PL) and infralimbic (IL)  
71 divisions of the rodent medial prefrontal cortex (Giustino and Maren, 2015). Learned fear has  
72 an obvious adaptive value, increasing the chance of survival in life threatening situations  
73 (Giustino and Maren, 2015). However, traumatic experiences can lead to exaggerated and

74 prolonged fear responses that can have pathological consequences, as seen in post-traumatic  
75 stress disorder (PTSD). Here, individuals experience recurring episodes of involuntary memories  
76 associated with an intense stress response, resulting in hyperalertness and avoidance of  
77 situations that remind them of the traumatic event (Blouin et al., 2016; Sareen, 2014).  
78 Interestingly, although there is a high chance of experiencing trauma in the population, only  
79 about 7% of people develop PTSD (Benjet et al., 2016; Kessler et al., 2005), suggesting that  
80 resilience or vulnerability to development of PTSD may be determined by experiential and/or  
81 genetic factors.

82

83 Rodents are widely used to study how stress affects learned fear memories. Stress-enhanced  
84 fear models usually combine exposure to one or more stressors, with fear responses tested in a  
85 conditioning paradigm (Blouin et al., 2016). One of the most widely-used and reproduced  
86 models is the single-prolonged stress protocol (SPS) developed by Liberzon (Liberzon et al.,  
87 1999, 1997). Exposure to SPS impairs extinction and extinction recall of a fear conditioned  
88 response one week later (Knox et al., 2012b, 2012a; Kohda et al., 2007), comprising a late-  
89 emerging enhancement of fear, as is characteristic of PTSD.

90

91 Prefrontal activity and neuronal intrinsic excitability is associated with stress resilience and  
92 vulnerability (Kumar et al., 2014). For example, in humans the aberrant fear response in PTSD  
93 is associated with ventromedial PFC (homolog to the rodent IL)(Öngür and Price, 2000)  
94 hypoactivity and loss of top-down control over the amygdala (Milad et al., 2009). In rodents,  
95 SPS also reduces neuronal activation in the IL (Piggott et al., 2019), which may play a role in the

96 abnormal fear extinction deficits associated with SPS. Conversely, optogenetic drive of  
97 the mPFC can promote stress resilience, and successful stress coping is linked to elevated mPFC  
98 activation after social defeat stress (Covington et al., 2010) . However, the circuitry underlying  
99 vulnerability and resilience are largely unknown (Russo et al., 2012).

100

101 In the present study we assess the impact of adolescent CVS on stress vulnerability or  
102 resilience to subsequent SPS in adulthood. Our data indicate that the experience of stress  
103 during adolescence blocks fear potentiation following SPS, leading to resilience, a phenomenon  
104 that can be linked to decreases in intrinsic excitability of IL mPFC glutamatergic pyramidal  
105 neurons.

106

107

## 108 **Results:**

109 Experiment 1: Cued conditioned response: Fig. 1.C-F illustrates the conditioned freezing  
110 response throughout the different sessions of the fear conditioning paradigm in animals  
111 that were submitted to chronic variable stress during adolescence (adol CVS) and later  
112 subjected to single prolonged stress (SPS) in adulthood. Animals were submitted to a tone-  
113 conditioned paradigm as shown in Fig 1.B. Fig 1.C-D show the effects for each phase of  
114 paradigm evaluated.

115 Conditioning: None of the treatments had effects on the conditioning phase. There was an  
116 interaction between adol CVS x SPS ( $F_{(1,79)}= 5.075, p=0.027$ ) but no individual differences in the  
117 Bonferroni test. The significant effect of time ( $F_{(5,395)}= 469.308, p<0.0001$ ) confirmed conditioning

118 of the response. There was main effect of sex ( $F_{(1,79)} = 7.724, p=0.007$ ), with Bonferroni  
119 comparisons indicating a general higher expression of freezing in male rats.

120 3-day extinction: There were significant effects of SPS ( $F_{(1,76)} = 6.698, p=0.012$ ) and time ( $F_{(2,152)} =$   
121  $475,661, p<0.0001$ ) and an adol CVS x SPS interaction ( $F_{(1,76)} = 7.414, p= 0.008$ ), with no effect of  
122 sex. The CVS x SPS post hoc analysis confirmed that, in general, SPS groups had higher freezing  
123 levels compared to controls over the whole extinction procedure regardless of sex. When  
124 performing planned comparisons by sex, only male rats showed statistical significant effects,  
125 with the SPS group having higher freezing than the control group on all three days ( $p<0.05$ ) (the  
126 CVS only group had enhanced freezing only on day 2 ( $p<0.05$ )). Prior adol CVS prevented the  
127 SPS effects, as the double-hit group remained at control levels on all testing days and had  
128 significantly less freezing than the SPS group on day 2 ( $p<0.05$ ). Sex differences were observed  
129 only on day 3, with SPS evoking higher freezing in male rats ( $p<0.05$ ).

130 Recall: The levels of extinction attained were stable for both sexes as tested in the recall phase.  
131 In this case, five days after extinction, animals received a brief extra extinction session (3 tones)  
132 to test for possible spontaneous recovery of the conditioned response and to corroborate that  
133 the levels of freezing in all the groups were equal before reinstatement. We observed a  
134 main effect of sex ( $F_{(1,76)} = 7.958, p=0.006$ ) with males expressing more freezing in general, and a  
135 triple interaction sex x adol CVS x SPS ( $F_{(1,76)} = 4.792, p=0.032$ ) with no group differences emerging  
136 for any individual Bonferroni comparison.

137 Reinstatement: We observed a significant adol CVS x SPS interaction  $F_{(1,76)} = 11.8095,$   
138  $p=0.001$ . Posthoc comparison indicated that regardless of sex, the SPS group expressed higher  
139 freezing than the control group ( $p<0.05$  respectively), while the double-hit group prevented the

140 effect of SPS, remaining at control freezing levels and expressing significantly less freezing time  
141 than the SPS group ( $p < 0.05$ ). When analyzing the individual responses by sex  
142 (planned comparisons), we observed that in female rats, only the SPS group differed from  
143 control ( $p < 0.05$ ). In the case of male rats, the SPS group had higher freezing than control  
144 ( $p < 0.05$ ) and the adol CVS-SPS group ( $p < 0.05$ ).

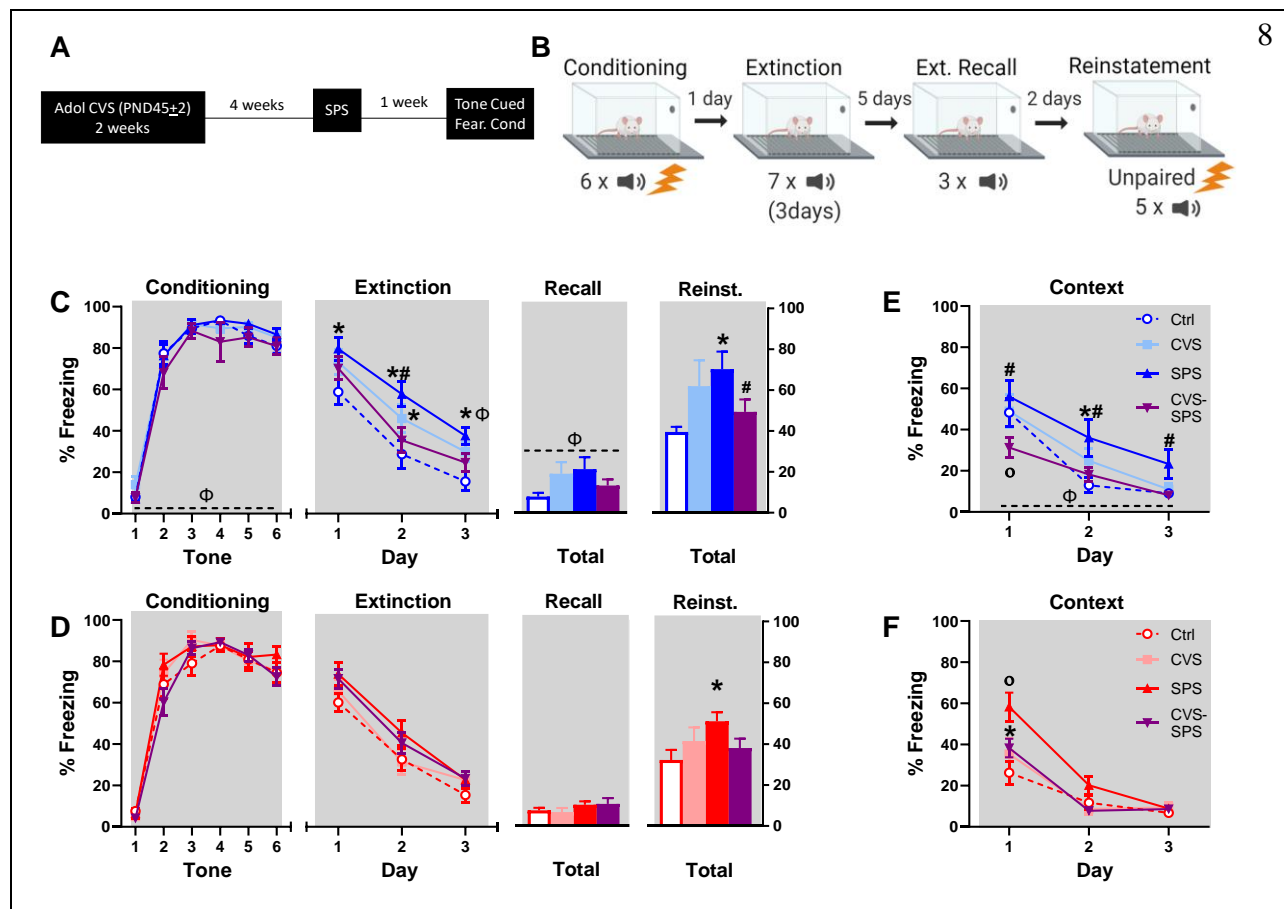

145

146 Context conditioned response: To quantify the conditioned response to the conditioning

147 context, we evaluated the freezing response evoked every day of the extinction procedure

148 before the first tone was presented and analyzed the progression over 3 days (Fig 1.E-F). We

149 observed a main effect of adol CVS  $F_{(1,76)}=4.097$ ,  $p=0.046$  and significant adol CVS x SPS

150 interaction  $F_{(1,76)}=11.729$ ,  $p=0.001$ . The posthoc analysis indicated that animals subjected to SPS



151 expressed higher freezing when re-exposed to the conditioning context compared to all the  
152 other groups ( $p < 0.05$  respectively). There was a sex effect  $F_{(1,76)} = 6.971$ ,  $p = 0.01$ , with male rats  
153 having more freezing time. There was also an effect of time  $F_{(2,152)} = 172.946$ ,  $p < 0.00001$ ,  
154 indicating reduction of freezing to subsequent exposure. Finally, there was a time x sex x  
155 SPS ( $F_{(2,152)} = 9.253$ ,  $p = 0.0002$ ) interaction. Planned comparisons showed that male rats subjected  
156 to SPS alone expressed higher freezing than the control group on day 2 while the group  
157 subjected to the double-hit model of stress had less context freezing compared to all the other  
158 groups on day 1 ( $p < 0.05$  respectively). This difference was maintained against the SPS group on  
159 the rest of the days tested ( $P < 0.05$  respectively). In the case of females, SPS group had higher  
160 freezing to the context than all the other groups on day 1 ( $p < 0.05$  respectively) and  
161 the adol CVS-SPS group also had more freezing compared to controls on that day ( $p < 0.05$ ).

162  
163 Fos expression after reinstatement: Figure 2 summarizes Fos activation (Fos immunoreactivity,  
164 Fos-ir) in the mPFC and amygdala assessed following the reinstatement trial (90  
165 min after the onset of the session). In the case of males, we observed a significant effect of SPS  
166 in the infralimbic (IL) cortex of male rats,  $F_{(1,16)} = 7.706$ ,  $p = 0.0135$ . Planned comparisons  
167 confirmed that the SPS groups had significantly less Fos-ir than the control and CVS animals  
168 ( $p < 0.05$ ), while the other groups did not differ from controls (Fig 2.A). In females, effects  
169 of adol CVS and SPS were only observed in the central nucleus of the amygdala, particularly, in  
170 lateral (CeL) but not medial subdivision of the central amygdala (CeM) (SPS  $F_{(1,23)} = 5.945$ ,  
171  $p = 0.0229$ , adol CVS x SPS  $F_{(1,23)} = 7.241$ ,  $p = 0.0130$ ). Bonferroni's test confirmed that SPS  
172 significantly increased neuronal recruitment ( $p < 0.05$ ) and this was prevented in the double-hit  
173 group ( $p < 0.05$ ) (Fig 2.B).

174

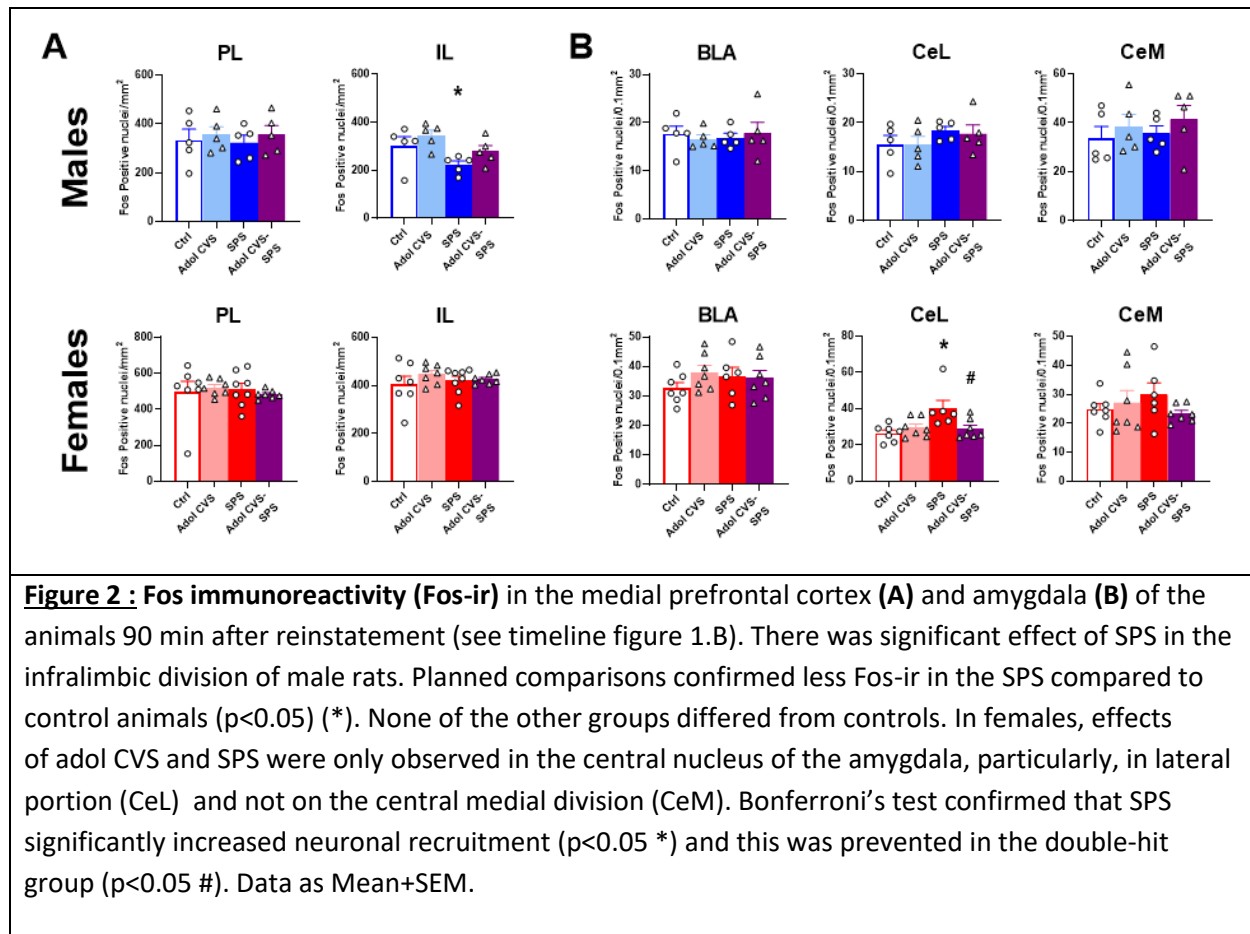

175

176 Experiment 3: Electrophysiology: We next investigated the potential cellular mechanisms  
 177 underlying how adolescent stress can prevent SPS-induced changes in fear behavior and Fos  
 178 activation in IL in male rats. Male rats were selected based on the clear effects of both SPS and  
 179 adolCVS/SPS on extinction learning, a process linked to the IL. We measured the intrinsic  
 180 membrane properties and firing frequency of IL pyramidal neurons in layer V, the major source  
 181 of subcortical output from the IL (Baker et al., 2018). We found that prior experience of adol  
 182 CVS prevented SPS-mediated changes in intrinsic excitability of IL pyramidal neurons. There was  
 183 a significant main effect of SPS ( $F_{(1,99)} = 32.3$ ,  $p < 0.0001^a$  (table 1)) and adol CVS ( $F_{(1,99)} = 8.5$ ,

184  $p=0.005^a$ ) on rheobase (Fig.3D). SPS significantly increased rheobase compared to the control  
185 group ( $p<0.05$ ), which was prevented by prior adol CVS ( $p<0.05$  compared to SPS). There was a  
186 significant main effect of SPS ( $F_{(1,98)}= 41.96$ ,  $p<0.0001^b$ ), adol CVS ( $F_{(1,98)}= 21.7$ ,  $p=0.0002^b$ ) and a  
187 significant adol CVS X SPS interaction ( $F_{(1,98)}= 6.7$ ,  $p=0.01^b$ ) on membrane resistance (Fig.3E).  
188 Bonferroni's test indicated that SPS significantly decreased membrane resistance ( $p<0.05$ ),  
189 which was prevented by prior adol CVS ( $p<0.05$  compared to SPS). Statistical analysis for  
190 membrane resistance was performed on log transformed data. There were significant main  
191 effects of SPS ( $F_{(1,92)}=19$ ,  $p<0.0001^c$ ), adol CVS ( $F_{(1,92)}=14.3$ ,  $p=0.0003^c$ ) and a significant adol CVS  
192 x SPS interaction ( $F_{(1,92)}=5.0$ ,  $p=0.02^c$ ) on action potential (AP) threshold (Fig 3F) . Bonferroni's  
193 test indicated that SPS significantly increased AP threshold compared to controls ( $p<0.05$ ), with  
194 prior adol CVS preventing the effect ( $p<0.05$  compared to SPS). There were main effects of SPS  
195 ( $F_{(1,97)}=20$ ,  $p<0.001^d$ ), adol CVS ( $F_{(1,97)}=25.9$ ,  $p<0.0001^d$ ) and significant adol CVS x SPS interaction  
196 ( $F_{(1,97)}= 6.5$ ,  $p=0.01^d$ ) on action potential amplitude (Fig.3G). Bonferroni's test indicated that SPS  
197 significantly lowered AP amplitude compared to controls ( $p<0.05$ ), and prior experience adol  
198 CVS prevented it ( $p<0.05$  compared to SPS). There was a significant effect of SPS ( $F_{(1,97)}=8.3$ ,  
199  $p=0.005^e$ ) and adol CVS ( $F_{(1,97)}= 42.2$ ,  $p<0.0001^e$ ) on AP50 (Fig. 3H). Planned comparisons  
200 indicated a decrease in AP50 following SPS compared to control ( $p<0.05$ ) and prior adol CVS  
201 prevented that effect ( $p<0.05$  compared to SPS). Increase in AP50 was also observed following  
202 adol CVS only ( $p<0.05$  compared to control). Resting membrane potential (RMP) was unaltered  
203 among the groups (Fig.3I). 2 way ANOVA revealed no significant main effect of SPS ( $F_{(1,95)}=1.3$ ,  
204  $p=0.3$ ), adol CVS ( $F_{(1,95)}=0.02$ ,  $p=0.9$ ) or SPSx adol CVS interaction on RMP ( $F_{(1,95)}=0.1$ ,  $p=0.7$ ).

205 Membrane capacitance was unaltered among groups (Fig.3J) indicating the treatments did not  
206 likely affect cell size. 2 way ANOVA of membrane capacitance revealed no significant main  
207 effect of SPS ( $F_{(1,97)}=1.8$ ,  $p=0.2$ ), Adol CVS ( $F_{(1,97)}=3.6$ ,  $p=0.06$ ) or SPSx adol CVS interaction  
208 ( $F_{(1,97)}=2.9$ ,  $p=0.09$ ). Analysis of peak firing frequency revealed a significant main effect of SPS  
209 ( $F_{(1,36)}=13.4$ ,  $p=0.0008^h$ ). Planned comparisons indicated that SPS significantly reduced peak  
210 firing frequency compared to controls ( $p<0.05$ ), whereas the prior adol CVS+SPS group did not  
211 differ from the control group (Fig.3K). Figure 3L shows representative traces of action potentials  
212 evoked by 20pA current injection for the respective groups. Together these data indicate that  
213 prior experience of adolescent stress is able to prevent the reduction in intrinsic excitability and  
214 firing rate of IL layer V pyramidal neurons following SPS.

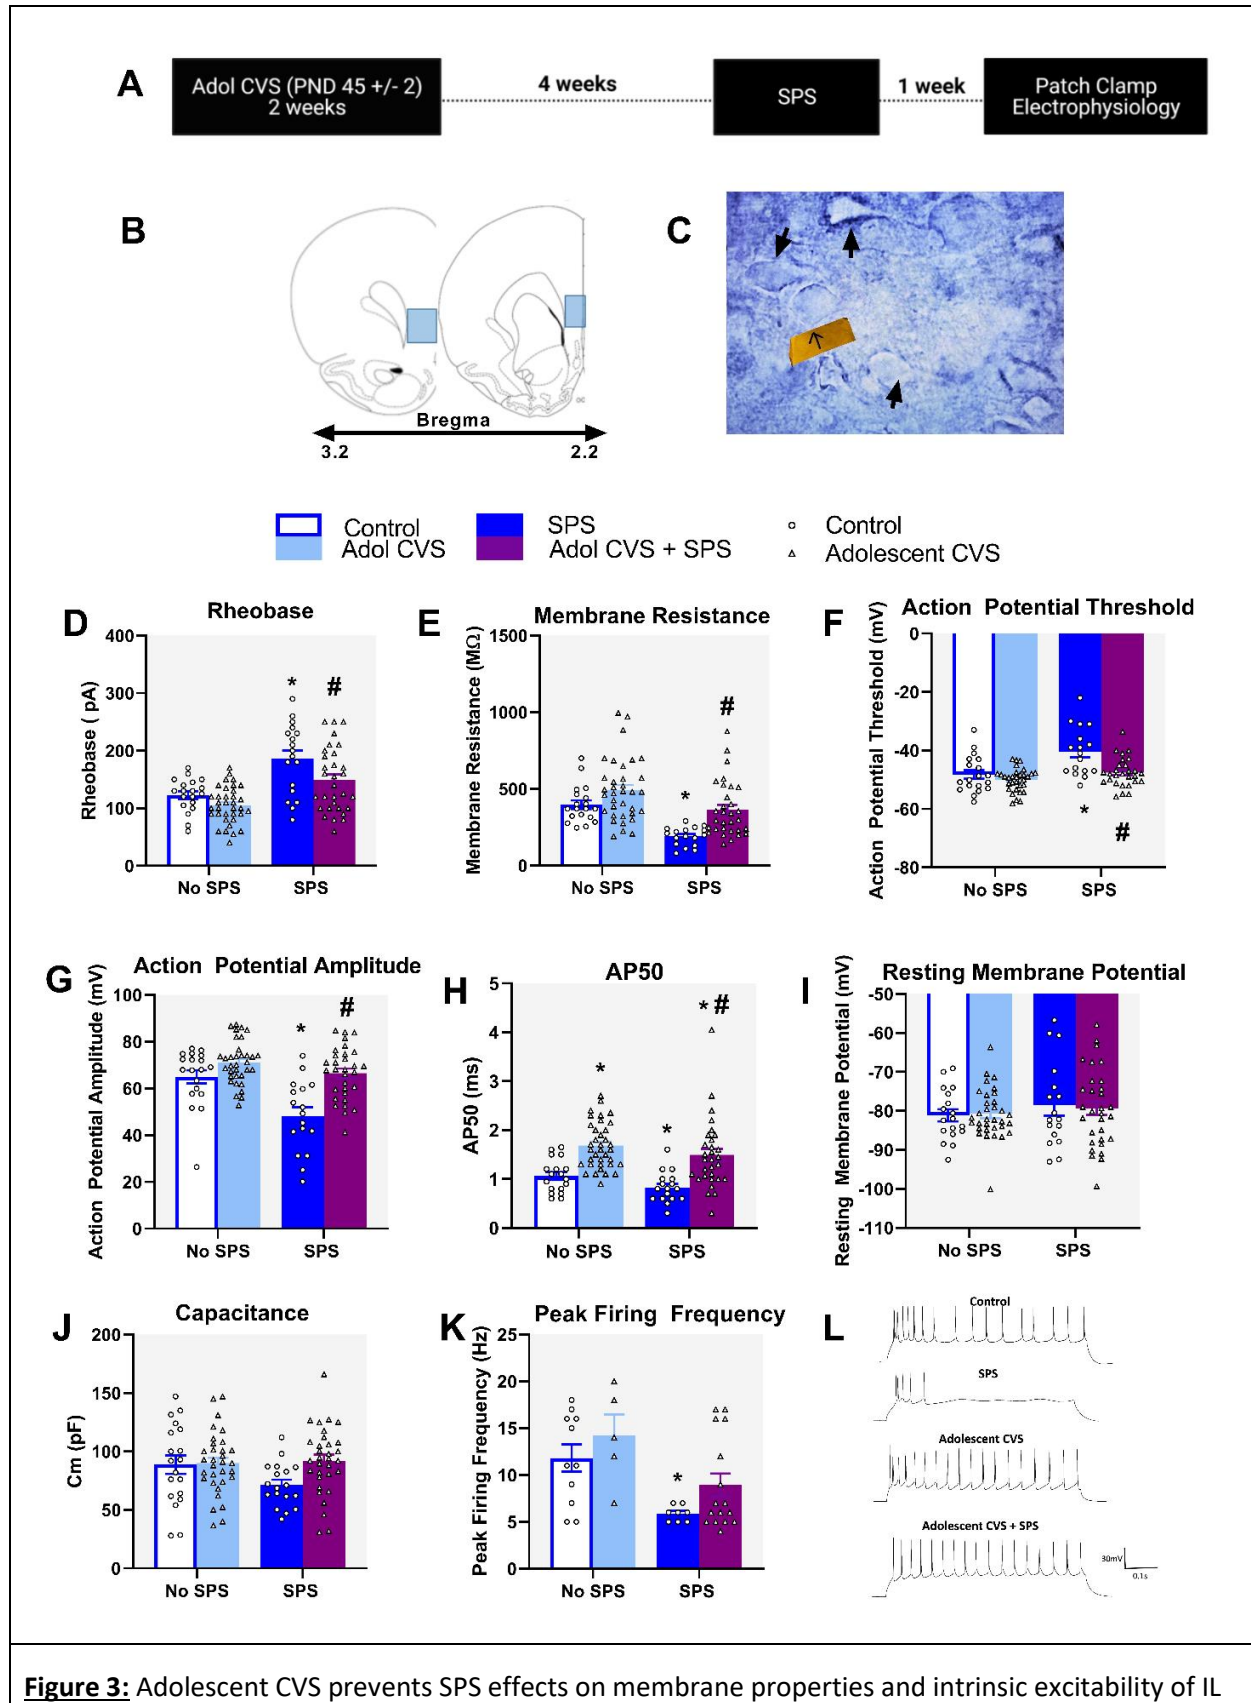

pyramidal neurons. **(A)** Experimental timeline; **(B)** Schematic of coronal brain sections through PFC where recordings were performed, blue boxes indicate infralimbic region of the PFC; **(C)** Pyramidal neurons were identified based on somal morphology and presence of prominent apical dendrite . Arrows indicate pyramidal neurons; SPS increased rheobase **(D)** and decreased membrane resistance **(E)**, whereas prior experience of adol CVS was able to prevent these effects. SPS increased the threshold for action potential (AP) firing **(F)** and decreased AP amplitude **(G)**, both of which were prevented by prior adol CVS. SPS also reduced the duration of AP (AP 50), which was also blocked by prior adol CVS. It should be noted that adol CVS alone increased AP duration **(H)**. Finally, adol CVS was also able to attenuate the reduction in peak firing frequency observed following SPS **(K)**. No changes in resting membrane potential **(I)** or membrane capacitance **(J)** were observed. **(L)** demonstrates representative traces of action potentials evoked by 20pA current injection for the respective groups; For D,H,K \* and # represents planned comparison effects compared with control and SPS respectively. For E, F and G\* and # represents post hoc Bonferroni effects compared with control and SPS respectively. Data represented as Mean±SEM.

215

216

## 217 **Discussion**

218 Our results strongly suggest that prior experience with stress during adolescence can evoke a  
219 resilient phenotype in the adult, characterized by the prevention of the effects of SPS in a fear  
220 conditioning paradigm and on IL pyramidal cell excitability. Our data indicate that the  
221 adaptations resulting from exposure to chronic stress during adolescence buffer the behavioral  
222 impact of a model of traumatic stress in adulthood, blocking known effects of SPS on  
223 subsequent fear potentiation.

224 While prior CVS is able to block enhancement of reinstatement in both sexes, it appears to do  
225 so by distinct neuronal mechanisms. Reversal of SPS-induced reinstatement was accompanied  
226 by IL hypoactivity in males and CeL recruitment in females, suggestion differential engagement  
227 of cortical regions regulating extinction (males) vs. fear expression (females) across the sexes.  
228 Notably extinction deficits were only observed in males, consistent with the known role of the  
229 IL in extinction of conditioned fear. A role for the IL in CVS-induced resilience in males is further  
230 supported by hypoactivity of layer V pyramidal cells following SPS, which is blocked by prior  
231 adolescent CVS (Figure 4).

232  
233 Stress during development is generally thought to evoke negative behavioral effects later in life  
234 (Begni et al., 2020; Bourke and Neigh, 2011; Cotella et al., 2020, 2019; Green et al., 2013;  
235 Negrón-Oyarzo et al., 2014; Wilkin et al., 2012; Wulsin et al., 2016). However, prior studies also  
236 support the ability of adolescent stress to confer stress resilience in adulthood, using a number  
237 of stress models, e.g., intermittent predator stress (Kendig et al., 2011) and predictable chronic  
238 mild stress (PCMS) (Suo et al., 2013). Adolescent PCMS enhances extinction and prevents  
239 reinstatement and spontaneous recovery in a fear conditioning model evaluated immediately  
240 and one week following PCMS (Deng et al., 2017). Consistent with our results, these suggest  
241 that adolescent stress enhancement of resilience endures well beyond the time of exposure.  
242 The impact of adolescent stress differs thatt of stress imposition earlier in life, where the data  
243 generally report detrimental effects of stress (Johnson and Casey, 2014; Lukkes et al., 2009;  
244 McEwen, 2007; Vyas et al., 2002; Yee et al., 2012).

245

246 Although some authors proposed that the resilient phenotype is promoted by the predictability  
247 of the stressors (Deng et al., 2017), the general unpredictable nature of CVS suggests that the  
248 resilience mechanism is independent of response habituation In our study, the adol CVS  
249 paradigm employs exposure to swim and restraint, albeit in an isolated and time-attenuated  
250 fashion relative to SPS. Nonetheless, the length and consecutive application of the stressors  
251 during SPS represents a distinct and intense unpredictable experience. This contention is  
252 supported by a recent report demonstrating behavioral resilience to SPS using exposure to  
253 completely different stressors during adolescence (Chaby et al., 2020).  
254 Timing combined with stressor modality seem to be an important factor as well. In this sense,  
255 prior work indicates adult resilience even after a single intense stressor protocol at PND37  
256 (Moore et al., 2014) or following 3 days of predator related stressors at PND33-35 (Chaby et al.,  
257 2020). In contrast, a 3-day pre-pubertal exposure to variate stressors failed to attenuate  
258 exaggeration of fear responses in adulthood (Tsoory et al., 2010; Yee et al., 2012), indicating  
259 that developmental timing is critical for establishment of resilience.  
260  
261



262 Hypoactivity of the medial PFC is observed in several mental health disorders, including PTSD

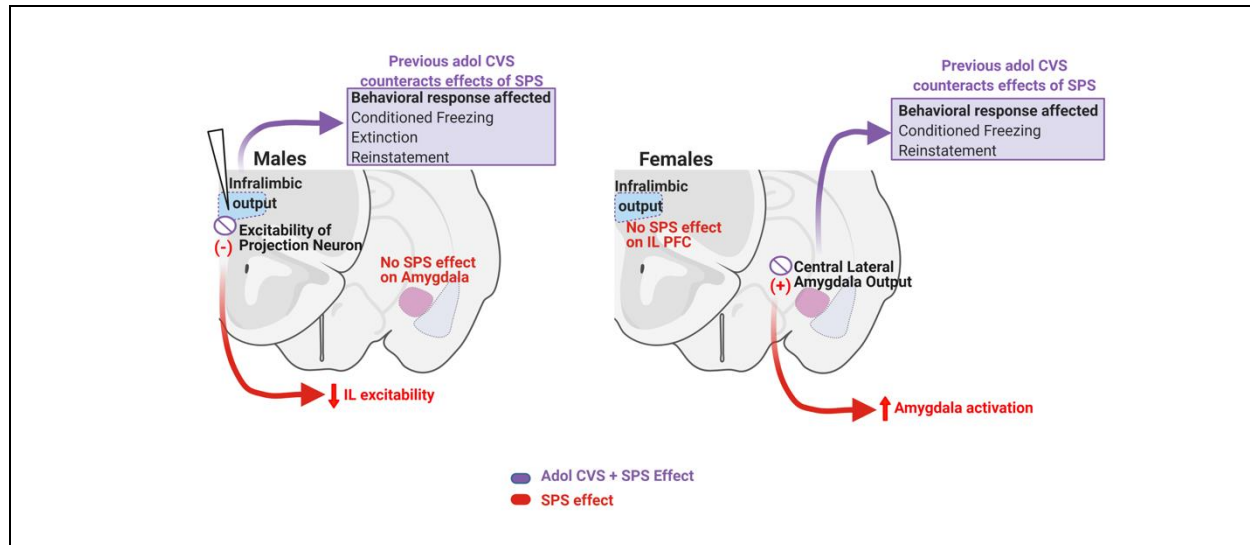

**Fig 4: Summary of the effects observed.** Prior exposure to adol CVS prevented the behavioral outcomes evoked by SPS in male and female rats. In the case of males, it also counteracted the effects of SPS on infralimbic excitability, indirectly inferred by Fos staining after reinstatement and confirmed by electrophysiology on pyramidal neurons from layer V. These central effects of adol CVS on SPS outcomes highlight the relevance of the infralimbic cortex as a hub for neurodevelopmental plasticity that could lead to resilience to stressful events in adulthood. In female rats, the absence of SPS effects in neuronal recruitment in the infralimbic cortex, accompanied by an increase of it in the central lateral division of the amygdala suggests a marked difference in the circuitry affected by SPS in both sexes. This points out to a possible mechanism involving excitability in that area that has yet to be confirmed.

263 (Hains and Arnsten, 2008). Results from our group and others indicate that stress during  
264 adolescence reduces neuronal recruitment (Fos expression) to adult stressors in the mPFC  
265 (Cotella et al., 2020, 2019; Ishikawa et al., 2015). In humans, PTSD has been associated with a  
266 reduction in prefrontal drive, leading to abnormal extinction of conditioned fear (Milad et al.,  
267 2009, 2006, 2005; Rauch et al., 2006). Similarly, reduced IL mPFC activity following SPS in male  
268 rats may underlie abnormal extinction of fear responses (Piggott et al., 2019). Consistent with  
269 these data, our results indicate reduced IL recruitment following SPS in male rats accompanied  
270 by higher freezing during extinction and reinstatement. The reduced engagement of the IL in

271 response to conditioned cues during the reinstatement procedure in the SPS male group also  
272 suggests a possible reduction of IL activity occurring during the prior extinction procedure,  
273 which would explain the impairment of extinction learning previously observed only in males  
274 rats.

275 Neurons in the mPFC are specifically activated during stressful situations and modulate their  
276 responses to subsequent exposure to the same stressor experience (Jackson and Moghaddam,  
277 2006), thus playing a critical role in eliciting adaptive responses to aversive stimuli (Milad and  
278 Quirk, 2002). Modification of PFC responses to the same stimulus can be mediated through  
279 altered glutamatergic or dopaminergic drive onto the mPFC projection neurons (Bagley and  
280 Moghaddam, 1997; Jackson and Moghaddam, 2004). Adolescent social defeat decreases adult  
281 NMDA receptor expression in the IL PFC, and also reduces freezing to fear conditioning (Novick  
282 et al., 2016). Thus, the enhanced excitability we observed in SPS rats with prior history of adol  
283 CVS might be a long-term adaptation to the reduced excitatory drive that may occur following  
284 adol CVS.

285 Intrinsic membrane properties play an important role in determining the prefrontal  
286 excitatory/inhibitory balance, as they directly shape neuronal output by influencing the  
287 probability of a neuron firing an action potential in response to synaptic inputs (Anderson et  
288 al., 2019). Our data indicate that the IL intrinsic excitability changes do not manifest at baseline  
289 conditions under adol CVS alone, consistent with prior work in mice resilient to social defeat  
290 (Friedman et al., 2014; Han and Nestler, 2017). Thus it is possible that prior adol CVS may serve  
291 to prime the pyramidal cells to react appropriately when faced with the second hit of SPS,  
292 compensating for reduced excitability associated with SPS. The exact mechanism underlying the

293 altered excitability of IL pyramidal neurons observed in our study is yet to be determined.  
294 Possibilities include lasting alteration in ion channel function (e.g., G protein-gated inwardly  
295 rectifying K<sup>+</sup> channels) (Anderson et al., 2019; Hearing et al., 2013) or modulation on  
296 excitability by hyperpolarization-activated cyclic nucleotide-gated channels (Shah, 2014).  
297 Further work is needed to identify the specific ionic mechanisms by which adolescent stress can  
298 protect against future stressors during adulthood. (Matovic et al., 2020).

299

### 300 **Conclusion:**

301 Our results support the idea that certain combinations of stressful situations during  
302 adolescence can be beneficial, evoking resilience to stress in adult life. We propose that, in  
303 rats, chronic variable stress during late adolescence determines differential activation or  
304 recruitment of the IL in response to intense stress in adulthood. This rearrangement of  
305 prefrontal activity results in a phenotype that is resilient to stress-enhanced fear learning,  
306 reducing contextual response, facilitating extinction and preventing reinstatement of the fear  
307 conditioned response following trauma, findings that may lend insight into understanding  
308 susceptibility of resilience to PTSD. Furthermore, our data guide our next steps to understand  
309 the sex specific effects in behavioral resilience following adolescent stress that pointed to  
310 fundamental sex differences in stress reactive brain regions and their involvement in  
311 resilience it would be important as well to determine which stressor type might result in a  
312 positive emotional valence and whether that ultimately evokes a resilience response. For  
313 example, the exercise (swim) or social component (crowding) of the adolescent CVS regimen  
314 might help individuals cope with subsequent stress in adulthood (Herring et al., 2010; Ozbay et

315 al., 2007). The next challenge is to find the most efficient developmental triggers for the  
316 generation of resilience to the effects of adult stress, possibly including positive developmental  
317 interventions, with the goal of reducing the incidence of stress-related affect conditions,  
318 including PTSD.

319

## 320 **Materials and Methods**

321 **Animals:** Male and female Sprague Dawley rats were bred in-house, weaned at postnatal day  
322 21 (PND21) and pair-housed in standard clear cages (20 cm height x22 cm width x43 cm length)  
323 under a 12 h light/ 12 h dark cycle (lights on at 7:00 am), at constant room temperature (23±2  
324 °C), with *ad libitum* access to food and water. All tests were performed during the light cycle,  
325 between 09:00 AM and 2:00 PM. All procedures and care performed in the animals were  
326 approved by the University of Cincinnati Institutional Animal Care and Use Committee.

327

|     |                                  |                                                                       |                               |
|-----|----------------------------------|-----------------------------------------------------------------------|-------------------------------|
| 328 | <b><u>Adolescent chronic</u></b> | 1 h shaker stress (100 rpm)                                           | <b><u>variable stress</u></b> |
|     |                                  | 1 h cold room (4 °C)                                                  |                               |
| 329 | <b><u>(adol CVS):</u></b> After  | 30 min hypoxia exposure (8 % O <sub>2</sub> and 92 % N <sub>2</sub> ) | weaning the                   |
|     |                                  | 30 min restraint in plexiglass adjustable cylinder                    |                               |
| 330 | animals, a cohort                | 10 min group cold swim (17±1 °C)                                      | was randomly                  |
|     |                                  | 20 min group warm swim (32±1 °C)                                      |                               |

331 assigned to 4 experimental groups Control (No CVS – No SPS), Adol CVS (only chronic stress in  
332 adolescence), SPS (only single prolonged stress in adulthood) and CVS-SPS or double-hit group  
333 (adol CVS + SPS in adulthood). The remaining animals from the litter were assigned to control  
334 and adol CVS groups for the evaluation in the novel object test and Morris water maze to assess  
335 general cognitive function. No more than 2 littermates were included in each experimental  
336 group. Rats were subjected to our standard 14 days CVS protocol during late adolescence (PND  
337 45 ± 2) following prior work from our group (Jankord et al., 2011). The **CVS paradigm** included a  
338 set of unpredictable variable stressors applied twice daily (AM and PM, see table). In addition,  
339 animals were exposed to overnight stressors every two days: 1) individual housing, 2) social  
340 crowding (six rats per cage). Control animals were maintained in the same room and only  
341 handled for normal husbandry. Except for overnight stressors, all the procedures related to CVS  
342 were performed in a different room. Following CVS, animals were allowed to recover for 4  
343 weeks to be then subjected to the single prolonged stress (SPS) protocol evaluated during  
344 adulthood. The timeline of the experiment is shown in Fig. 1.

345

346

347

348 **Single prolonged stress (SPS):** A groups of rats subjected to adolescent CVS (and their

349 respective controls) were subjected to SPS 4 weeks after the end of CVS. For this, starting at

350 9:00 AM, animals were restrained for 2 hours in plexiglass adjustable cylinders dimensions  
351 20cm X 7 cm. Immediately after 2h elapsed, they were subjected to 20 minutes of group swim  
352 (25 + 2°C) in a bucket with dimensions 50cm X 33cm. Immediately after they were retrieved  
353 from the water and the excess of water was eliminated from their coat, they were allowed to  
354 recover for 15 minutes in their home cage with their cage mate. Next, rats were placed into a  
355 glass chamber where they were exposed to ether vapor until loss of consciousness (loss of  
356 righting position and palpebral reflex). Immediately after unconsciousness was confirmed they  
357 were placed in a cage with clean bedding material and returned to their housing room. SPS was  
358 administered in a novel experimental room. After SPS, animals remained undisturbed for a  
359 week (the usual time required to observe SPS effects (Knox et al., 2012b; Kohda et al., 2007;  
360 Wen et al., 2015)). Control rats remained in the housing room during the application of SPS and  
361 were only subjected to cage change during that time.

362

363 **Cued Fear Conditioning Paradigm:** A week after SPS all groups were subjected to an auditory  
364 tone cued fear conditioning protocol to evaluate the performance of the animals during the  
365 conditioning, extinction, and reinstatement sessions. Behavioral evaluation occurred between  
366 8:30 AM – 2:00 PM. **Conditioning:** animals were allowed to explore the conditioning chamber  
367 for 3 min, after which they were exposed to a 20s auditory tone (conditioned stimulus, CS), co-  
368 terminating with a 0.5s, 0.45mA shock (unconditioned stimulus, US), with an inter-trial interval  
369 (ITI) of 120s. The tone-shock pairings were repeated six times. Data were presented as %  
370 Freezing over CS time (20s). **Extinction:** 24 h after conditioning animals were subjected to 3  
371 consecutive days of extinction in which they were exposed to 7 repetitions of the CS with 120s

372 ITI in the same conditioning chambers. Data were presented as Total % Freezing over the 3 days  
373 of the extinction procedure, corresponding to the cumulative % of freezing expressed over the  
374 cumulative CS time during the whole extinction session (7x20s: 140s). **Recall test:** 5 days after  
375 the last extinction session animals were placed in the conditioning chambers and exposed to 3  
376 repetitions of the CS, with 120 s ITI with the purpose of evaluating spontaneous recovery of the  
377 conditioned response. Data were presented as Total % Freezing calculated as cumulative % of  
378 freezing expressed over the cumulative CS time during the session (3x20s: 60s).

379 **Reinstatement:** 48h after the recall session animals were exposed to a reinstatement session  
380 in the same conditioning chambers, consisting of 3 min of chamber exploration followed by 1  
381 unpaired shock (US) (0.45 mA, 0.5s). After a delay of 120s animals were exposed to 5  
382 repetitions of the CS (120s ITI). Data were expressed as total % Freezing during tones after  
383 unpaired shock, Total % Freezing over the cumulative duration of CS time (5x20s= 100s). Rats  
384 were euthanized 90 min after the onset of the session to obtain brains for  
385 immunohistochemistry.

386 **Context fear conditioning test:** As a way of quantifying the conditioned response to the  
387 context, we evaluated the initial freezing response exerted every day of the extinction  
388 procedure before the first tone was presented and analyzed the progression of this response  
389 over the 3 days. Data were expressed as % Freezing over the initial pre-tone exploration time  
390 (120s).

391 The conditioned response evaluated was freezing behavior, considered as general absence of  
392 movement, which was scored using a video tracking system (EthovisionXT-Noldus). We did not  
393 consider other behaviors as, in our set up, animals do not show conditioned darting or any

394 other escape related behaviors, with both sexes consistently exhibiting freezing in response to  
395 the tone. 90 minutes after reinstatement rats were euthanized to obtain their brains for  
396 immunodetection of Fos, a marker of neuronal activation. Results were analyzed considering  
397 sex as a variable.

398 Group composition fear conditioning experiment: The experiment was originally designed with  
399 10 male rats per group and 12 female rats per group. A male rat assigned to CVS died of  
400 unknown reasons during the first week of CVS resulting in a n of 9 for that group. A spare rat  
401 was added to that home cage to avoid having to exclude the house mate of the lost individual  
402 due to isolation. Later, on extinction day 2, there was a malfunction of the conditioning  
403 chambers which resulted in shocking the animals as soon as the session started. This resulted in  
404 the exclusion of the 3 animals run during that session (2 controls, 1 CVS). Therefore beginning  
405 day 2 of the paradigm, the n for control and CVS males was 8.

406 In the case of females, we originally planned to include 12 females per group, nevertheless, due  
407 to a mistake during the day of SPS, 1 cage of CVS animals was wrongfully submitted to SPS in  
408 lieu of a cage without CVS planned to get SPS. That resulted in an imbalance in the final number  
409 of animals per group: Control and CVS-SPS groups had n=14 and CVS and SPS groups had n=10.

410 The experimental timeline is shown in Figure 1.

411 **Immunohistochemistry:** Rats were euthanized with an overdose of sodium pentobarbital and  
412 immediately transcardially perfused with 0.9 % saline followed by 4 % paraformaldehyde in  
413 0.1M phosphate buffer (PBS), pH 7.4. Brains were post-fixed in 4 % paraformaldehyde at 4 °C  
414 for 24 h, then transferred to 30 % sucrose in 0.1 M PBS at 4 °C where they were kept until tissue  
415 processing. Brains were sliced into serial 35 µm coronal sections using a freezing microtome



416 (-20 °C). Sections were collected into multi-well plates containing cryoprotectant solution (30 %  
417 Sucrose, 1 % polyvinyl-pyrrolidone (PVP-40), and 30 % ethylene glycol in 0.1M PBS). For  
418 immunolabeling, sections were washed 6×5 min in 0.01M PBS at room temperature (RT). After  
419 being rinsed, sections were incubated with 1 % sodium borohydride in 0.1 M PBS for 30 min at  
420 RT. After rinsing 6×5 min 0.1 M PBS, they were incubated in 3 % hydrogen peroxide diluted in  
421 0.1M PBS for 20 min. Subsequently, brain slices were rinsed 6×5 min and 4×15 min in 0.1M PBS  
422 and then incubated in blocking solution (4 % normal goat serum (NGS), 0.4 % TritonX-100, 0.2 %  
423 bovine serum albumin (BSA) in 0.1M PBS, 2 h at RT. Sections were then incubated with c-Fos  
424 rabbit polyclonal antibody (1:1000, Santa Cruz, sc-52) in blocking solution, overnight at RT. The  
425 next day, sections were rinsed (3×5 min) in 0.1 M PBS at RT, followed by incubation with  
426 secondary antibody (biotinylated goat anti-rabbit, 1:400; Vector Laboratories, BA1000) in  
427 blocking solution at RT for 1 h. Sections were again rinsed (3×5 min) in 0.1 M PBS and then  
428 reacted with avidin-biotin horseradish peroxidase complex (1:800 in 0.1 M PBS; Vector  
429 Laboratories) for 1 h at RT. Sections were then rinsed (3×5 min) in 0.1 M PBS and then  
430 developed with a 8 min incubation in DAB-Nickel solution: 10 mg 3,3'-diaminobenzidine (DAB)  
431 tablet (Sigma, DF905), 0.5 ml of a 2 % aqueous nickel sulfate solution, 20ul of 30 % hydrogen  
432 peroxide in 50 ml of 0.1 M PBS. Sections were finally washed in PBS, mounted on superfrost  
433 slides (Fisherbrand, Fisher), allowed to dry, dehydrated in xylene, and then coverslipped in DPX  
434 mounting medium (Sigma). Sections from 5 to 7 brains per experimental group were processed.  
435 For analysis, we counted 3 bilateral sections from equivalent coordinates covering the anterior,  
436 medial and posterior portions of the prefrontal cortex (PFC), nuclei in the amygdala: central  
437 amygdaloid nucleus (CeAm), medial amygdaloid nucleus (MeAm), lateral amygdaloid nucleus

438 (LAm) and basolateral amygdala (BLA). Each brain region limit and coordinates were defined  
439 following a brain atlas (Paxinos and Watson, 2007). The number of Fos positive nuclei was  
440 counted with a semiautomatized method using ImageJ software (National Institutes of Health,  
441 Bethesda, MD). Counts of Fos immunoreactive cells were obtained from each area of interest  
442 using the Analyze Particle tool, using a defined common level of background intensity, nuclei  
443 circularity and size (previously validated manually). Once the number of Fos positive nuclei was  
444 determined in each section, the relative density of the population of immunopositive cells was  
445 calculated by dividing this number by the area measured in each case. Considering that the  
446 number of animals used simultaneously in the study makes it logistically complicated to process  
447 all the tissue at the same time or separating in batches and obtain homogenous immune  
448 staining, we decided to prioritize the within sex results for the Fos quantification and tissue  
449 from male and female rats was processed and analyzed independently.

450

451

452 **Electrophysiology:** Following the same timeline as the behavioral studies, whole-cell patch  
453 clamp recordings were obtained from layer V pyramidal neurons in the IL PFC. Details of slice  
454 preparation and electrophysiology recordings from adult PFC are given below.

455

456 **Slice Preparation:** Rats were sacrificed 7 days post SPS. Animals were deeply anesthetized with  
457 sodium pentobarbital (390 mg/kg, Fatal-Plus) and decapitated. A warm slicing protocol was  
458 used to prepare healthy adult rat brain slices as previously described (Ting et al., 2014). Brains  
459 were quickly isolated and dura matter carefully removed before removing the cerebellum. The

460 brain was then immediately glued to a cutting stage immersed in NMDG solution (92 mM  
461 NMDG, 2.5 mM KCl, 1.2 mM NaH<sub>2</sub>PO<sub>4</sub>, 30 mM NaHCO<sub>3</sub>, 20 mM HEPES, 25 mM glucose, 5 mM  
462 sodium ascorbate, 2 mM thiourea, 3 mM sodium pyruvate, 10 mM MgSO<sub>4</sub>, and 0.5 mM CaCl<sub>2</sub>)  
463 at a temperature of 34-36°C and continuously bubbled with 95% oxygen and 5% carbon-  
464 dioxide. Coronal slices containing the mPFC were sectioned at 300 µm thickness using a  
465 vibrating microtome (7000smz-2; Campden Instruments, Lafayette, IN) with ceramic blades  
466 (Campden Instruments) at an advance speed of 0.03 mm/s. Vertical vibration of the blade was  
467 manually tuned in accordance with the user manual, and was set to 0.1 – 0.3 µm. Bath  
468 temperature was kept within the desired range of 34-36°C, by adding warm or cold water into  
469 the external chamber of the slicer, and was monitored throughout the cutting procedure with a  
470 conventional mercury/glass thermometer. The slices were allowed to recover for 1 hour in  
471 oxygenated NMDG solution at 34-36°C. At the end of recovery, slices were transferred to a  
472 chamber containing oxygenated artificial CSF solution (125 mM NaCl, 2.5 mM KCl, 25 mM  
473 NaHCO<sub>3</sub>, 1 mM NaH<sub>2</sub>PO<sub>4</sub>, 25 mM glucose, 1 mM MgCl<sub>2</sub>, 2 mM CaCl<sub>2</sub>) for at least 30 minutes at  
474 room temperature after which the slices were ready for in vitro patch clamp recordings for the  
475 next 1-6 hours.

476 **Electrophysiological recording:** Brain slices were transferred to a submersion-type recording  
477 chamber (RC-22; Warner Instruments, Hamden, CT) and mounted onto the stage of an upright  
478 microscope (BX51WI, Olympus, Center Valley, PA). Slices were then perfused at a flow rate of  
479 2–4 ml/min with oxygenated aCSF at 34-36°C. Patch electrodes were constructed from thin-  
480 walled single-filamented borosilicate glass (1.5 mm outer diameter; World Precision  
481 Instruments) using a microelectrode puller (P-97; Sutter Instruments, Novato, CA) and filled

482 with an intracellular solution (130 mM K-gluconate, 10 mM KCl, 10 mM HEPES, 10 mM sodium  
483 phosphocreatine, 4 mM MgATP, and 0.3 mM Na<sub>2</sub>-GTP, pH 7.2, 295-300 mOsm). Pipette  
484 resistances ranged from 4 to 6 MΩ, and seal resistances were > 1 GΩ.

485 Whole-cell patch clamp recordings were obtained from layer V pyramidal in the mPFC using a  
486 MultiClamp 700B Amplifier (Molecular Devices, Sunnyvale, CA). Pyramidal neurons were easily  
487 identifiable in the slice based on soma morphology and the presence of a prominent apical  
488 dendrite. In the current clamp mode, once a stable membrane potential was observed, intrinsic  
489 excitability measurements were performed at the resting membrane potential (RMP). Cell  
490 capacitance was measured using the membrane test function in pClamp 10.4 (Molecular  
491 Devices, Sunnyvale, CA, USA). All measurements of intrinsic membrane excitability were taken  
492 from RMP. Rheobase was measured by applying depolarizing current steps (10 pA steps, 100  
493 msec duration) until the generation of a single action potential (AP). Input resistance was  
494 measured by applying a hyperpolarizing current step (-20 pA) via the patch electrode. AP  
495 threshold was defined as the V<sub>m</sub> measured 0.5ms before the peak in the second derivative of  
496 the waveform. The action potential threshold and amplitude were analyzed for the first spike at  
497 the rheobase current injection. Duration of APs (AP<sub>50</sub>) was determined by measuring the  
498 elapsed time from the peak of the AP to 50% maximum amplitude during the repolarization  
499 phase. Cells with RMP lower than -55mV were included for the final analysis. Outliers were  
500 detected using the Grubbs' test (GraphPad Software) and removed from analysis. For AP<sub>50</sub>: 1  
501 neuron from control and adol CVS+ SPS group; RMP: 1 neuron from control and adol CVS; AP  
502 amplitude: 1 neuron from adol CVS group; Membrane resistance: 1 neuron from adol CVS + SPS  
503 group; Capacitance: 1 neuron from control and 3 neurons from adol CVS group and for AP

504 threshold 3 neurons from adol CVS and adol CVS+SPS were removed as outliers. Firing rate was  
505 measured in response to 20 pA and 1 sec duration depolarizing current steps in the current  
506 clamp configuration. Only cells that produced greater or equal to 5 action potentials for up to  
507 240 pA current injection were included in the final analysis. Peak firing frequency was reported  
508 as the maximum number of action potentials generated in a given neuron following a current  
509 injection step. Number of cells used for electrophysiology are outlined in table 1. Membrane  
510 voltages were adjusted for liquid junction potentials (approximately  $-14$  mV) calculated using  
511 JPCalc software (P. Barry, University of New South Wales, Sydney, Australia; modified for  
512 Molecular Devices). Signals were filtered at 4–6 kHz through a  $-3$  dB, four-pole low-pass Bessel  
513 filter and digitally sampled at 20 kHz using a commercially available data acquisition system  
514 (Digidata 1550A with pClamp 10.4 software). Data were recorded using pClamp, version 10.4  
515 (Molecular Devices) and stored on a computer for offline analysis. Recordings were detected  
516 and analysed using Clampfit (Molecular Devices).

### 517 **Statistical analysis**

518 Fear conditioning data were analyzed by repeated measurements ANOVA (adol CVS x SPS x Sex  
519 x time), with a level of significance of  $p < 0.05$ . Novel object recognition and Morris water maze  
520 data were analyzed by 2x2 ANOVA (Adol CVS x Sex). Fos data were analyzed by a 2-way ANOVA  
521 (2x2 design: adol CVS x SPS) within each sex with a level of significance  $p < 0.05$ .  
522 Electrophysiology data were analyzed by 2x2 ANOVA (adol CVS x SPS). Details of number of cells  
523 used for electrophysiology data analysis are outlined in table 1. In the cases where significant  
524 differences and interactions were found, the Bonferroni test was used for post hoc analysis. In  
525 the case there were only main effects of the factors but no significant interaction between

526 them, we performed planned comparisons to evaluate individual differences. Data were  
527 analyzed using STATISTICA 7.0 (Statsoft, Inc.,Tulsa, USA) and Prism 8 (GraphPad Software, La  
528 Jolla California USA). Data not following a normal distribution were log transformed for  
529 statistical analysis.

530 **Table 1.**

531 Table depicts number of cells used for the electrophysiology data analysis

|   | Number of cells                                                                                                                                                                                                  |
|---|------------------------------------------------------------------------------------------------------------------------------------------------------------------------------------------------------------------|
| a | Rheobase was measured in 19 neurons in the control group, 17 neurons in SPS group, 35 neurons in adolescent stress group, 31 neurons in adolescent stress and SPS group n=2-3 animals/group                      |
| b | Membrane resistance was measured in 19 neurons in control group, 17 neurons in SPS group, 35 neurons in adolescent stress group and 30 neurons in the adolescent stress and SPS group n=2-3 animals/group        |
| c | AP threshold was measured in 19 neurons in control group, 17 neurons in SPS group, 32 neurons in adolescent stress group and 28 neurons in the adolescent stress and SPS group n=2-3 animals/group               |
| d | AP amplitude was measured in 19 neurons in control group, 17 neurons in SPS group, 34 neurons in adolescent stress group and 31 neurons adolescent stress and SPS group n=2-3 animals/group                      |
| e | AP <sub>50</sub> was measured in 18 neurons in control group, 17 neurons in SPS group, 35 neurons in adolescent stress group and 30 neurons in the adolescent stress and SPS group n=2-3 animals/group           |
| f | Resting membrane potential was measured in 18 neurons in control group, 17 neurons in SPS group, 34 neurons in adolescent stress group and 31 neurons in the adolescent stress and SPS group n=2-3 animals/group |
| g | Capacitance was measured in 19 neurons in control group, 17 neurons in SPS group, 32 neurons in adolescent stress group and 31 neurons in the adolescent stress and SPS group n=2-3 animals/group                |
| h | Peak firing frequency was measured in 11 neurons in control group, 8 neurons in SPS group, 5 neurons in adolescent stress group and 16 neurons in the adolescent stress and SPS group n=2-3 animals/group        |

532

533 **Acknowledgements:** The authors would like to thank other members of Dr Herman's laboratory  
534 for their assistance in data collection and general discussion of the results. Images were created  
535 with BioRender.com.

536

537 **Funding:** This project was funded by the National Institutes of Health (R01MH101729, R01  
538 MH049698 and R01 MH119814 to JPH, T32 DK059803 to EMC and SEM, F31MH123041 to NN),  
539 U.S. Department of Veterans Affairs (Grant I01BX003858 to JPH), NARSAD Young Investigator  
540 Award from the Brain and Behavior Research Foundation to RDM, Cohen Veterans Bioscience:  
541 Preclinical Grants Program (AMP-IT-UP) to SEM.

542

543 **Competing Interests:** The authors declare that this study was conducted in the absence of any  
544 financial or commercial relationships that could be considered as a potential conflict of interest.

545

## 546 **References**

547 Andersen SL, Teicher MH. 2008. Stress, sensitive periods and maturational events in adolescent  
548 depression. *Trends Neurosci* **31**:183–91. doi:10.1016/j.tins.2008.01.004

549 Anderson EM, Gomez D, Caccamise A, McPhail D, Hearing M. 2019. Chronic unpredictable  
550 stress promotes cell-specific plasticity in prefrontal cortex D1 and D2 pyramidal neurons.  
551 *Neurobiol Stress* **10**:100152. doi:10.1016/j.ynstr.2019.100152

552 Bagley J, Moghaddam B. 1997. Temporal dynamics of glutamate efflux in the prefrontal cortex  
553 and in the hippocampus following repeated stress: Effects of pretreatment with saline or  
554 diazepam: *Neuroscience* **77**:65–73. doi:10.1016/S0306-4522(96)00435-6

555 Baker A, Kalmbach B, Morishima M, Kim J, Juavinett A, Li N, Dembrow N. 2018. Specialized  
556 subpopulations of deep-layer pyramidal neurons in the neocortex: Bridging cellular  
557 properties to functional consequences. *J Neurosci* **38**:5441–5455.

558 doi:10.1523/JNEUROSCI.0150-18.2018

- 559 Begni V, Zampar S, Longo L, Riva MA. 2020. Sex Differences in the Enduring Effects of Social  
560 Deprivation during Adolescence in Rats: Implications for Psychiatric Disorders.  
561 *Neuroscience* **437**:11–22. doi:10.1016/j.neuroscience.2020.04.018
- 562 Benjet C, Bromet E, Karam EG, Kessler RC, McLaughlin KA, Ruscio AM, Shahly V, Stein DJ,  
563 Petukhova M, Hill E, Alonso J, Atwoli L, Bunting B, Bruffaerts R, Caldas-de-Almeida JM, de  
564 Girolamo G, Florescu S, Gureje O, Huang Y, Lepine JP, Kawakami N, Kovess-Masfety V,  
565 Medina-Mora ME, Navarro-Mateu F, Piazza M, Posada-Villa J, Scott KM, Shalev A, Slade T,  
566 ten Have M, Torres Y, Viana MC, Zarkov Z, Koenen KC. 2016. The epidemiology of  
567 traumatic event exposure worldwide: results from the World Mental Health Survey  
568 Consortium. *Psychol Med* **46**:327–43. doi:10.1017/S0033291715001981
- 569 Blouin AM, Sullivan SE, Joseph NF, Miller CA. 2016. The potential of epigenetics in stress-  
570 enhanced fear learning models of PTSD. *Learn Mem* **23**:576–86.  
571 doi:10.1101/lm.040485.115
- 572 Bourke CH, Neigh GN. 2011. Behavioral effects of chronic adolescent stress are sustained and  
573 sexually dimorphic. *Horm Behav* **60**:112–120. doi:10.1016/J.YHBEH.2011.03.011
- 574 Chaby LE, Sadik N, Burson NA, Lloyd S, O'Donnell K, Winters J, Conti AC, Liberzon I, Perrine SA.  
575 2020. Repeated stress exposure in mid-adolescence attenuates behavioral, noradrenergic,  
576 and epigenetic effects of trauma-like stress in early adult male rats. *Sci Rep* **10**:17935.  
577 doi:10.1038/s41598-020-74481-3
- 578 Cotella EM, Morano RL, Wulsin AC, Martelle SM, Lemen P, Fitzgerald M, Packard BA, Moloney  
579 RD, Herman JP. 2020. Lasting Impact of Chronic Adolescent Stress and Glucocorticoid  
580 Receptor Selective Modulation in Male and Female Rats. *Psychoneuroendocrinology*



- 581           **112**:104490. doi:10.1016/j.psyneuen.2019.104490
- 582   Cotella EM, Scarponi Gómez A, Lemen P, Chen C, Fernández G, Hansen C, Herman JP, Paglini  
583           MG. 2019. Long-term impact of chronic variable stress in adolescence versus adulthood.  
584           *Prog Neuro-Psychopharmacology Biol Psychiatry* **88**:303–310.  
585           doi:10.1016/J.PNPBP.2018.08.003
- 586   Covington HE, Lobo MK, Maze I, Vialou V, Hyman JM, Zaman S, LaPlant Q, Mouzon E, Ghose S,  
587           Tamminga CA, Neve RL, Deisseroth K, Nestler EJ. 2010. Antidepressant Effect of  
588           Optogenetic Stimulation of the Medial Prefrontal Cortex. *J Neurosci* **30**:16082–16090.  
589           doi:10.1523/JNEUROSCI.1731-10.2010
- 590   de Kloet ER, Joëls M, Holsboer F. 2005. Stress and the brain: from adaptation to disease. *Nat*  
591           *Rev Neurosci* **6**:463–475. doi:10.1038/nrn1683
- 592   Deng JH, Yan W, Han Y, Chen C, Meng SQ, Sun CY, Xu LZ, Xue YX, Gao XJ, Chen N, Zhang FL,  
593           Wang YM, Shi J, Lu L. 2017. Predictable Chronic Mild Stress during Adolescence Promotes  
594           Fear Memory Extinction in Adulthood. *Sci Rep* **7**:1–15. doi:10.1038/s41598-017-08017-7
- 595   Friedman AK, Walsh JJ, Juarez B, Ku SM, Chaudhury D, Wang J, Li X, Dietz DM, Pan N, Vialou VF,  
596           Neve RL, Yue Z, Han MH. 2014. Enhancing depression mechanisms in midbrain dopamine  
597           neurons achieves homeostatic resilience. *Science (80- )* **344**:313–319.  
598           doi:10.1126/science.1249240
- 599   Giustino TF, Maren S. 2015. The Role of the Medial Prefrontal Cortex in the Conditioning and  
600           Extinction of Fear. *Front Behav Neurosci* **9**. doi:10.3389/fnbeh.2015.00298
- 601   Green MR, Barnes B, McCormick CM. 2013. Social instability stress in adolescence increases  
602           anxiety and reduces social interactions in adulthood in male long-evans rats. *Dev*

- 603 *Psychobiol* **55**:849–859. doi:10.1002/dev.21077
- 604 Hains AB, Arnsten AFT. 2008. Molecular mechanisms of stress-induced prefrontal cortical  
605 impairment: implications for mental illness. *Learn Mem* **15**:551–64.  
606 doi:10.1101/lm.921708
- 607 Han MH, Nestler EJ. 2017. Neural Substrates of Depression and Resilience. *Neurotherapeutics*.  
608 doi:10.1007/s13311-017-0527-x
- 609 Hearing M, Kotecki L, MarronFernandezdeVelasco E, Fajardo-Serrano A, Chung HJ, Luján R,  
610 Wickman K. 2013. Repeated Cocaine Weakens GABAB-Girk Signaling in Layer 5/6  
611 Pyramidal Neurons in the Prelimbic Cortex. *Neuron* **80**:159–170.  
612 doi:10.1016/j.neuron.2013.07.019
- 613 Heim C, Newport DJ, Mletzko T, Miller AH, Nemeroff CB. 2008. The link between childhood  
614 trauma and depression: Insights from HPA axis studies in humans.  
615 *Psychoneuroendocrinology* **33**:693–710. doi:10.1016/J.PSYNEUEN.2008.03.008
- 616 Herring MP, O'Connor PJ, Dishman RK. 2010. The effect of exercise training on anxiety  
617 symptoms among patients: A systematic review. *Arch Intern Med*.  
618 doi:10.1001/archinternmed.2009.530
- 619 Ishikawa J, Nishimura R, Ishikawa A. 2015. Early-life stress induces anxiety-like behaviors and  
620 activity imbalances in the medial prefrontal cortex and amygdala in adult rats. *Eur J*  
621 *Neurosci* **41**:442–453. doi:10.1111/ejn.12825
- 622 Jackson ME, Moghaddam B. 2006. Distinct patterns of plasticity in prefrontal cortex neurons  
623 that encode slow and fast responses to stress. *Eur J Neurosci* **24**:1702–1710.  
624 doi:10.1111/j.1460-9568.2006.05054.x

- 625 Jackson ME, Moghaddam B. 2004. Stimulus-specific plasticity of prefrontal cortex dopamine  
626 neurotransmission. *J Neurochem* **88**:1327–1334. doi:10.1046/j.1471-4159.2003.02205.x
- 627 Jankord R, Solomon MB, Albrecht J, Flak JN, Zhang R, Herman JP. 2011. Stress vulnerability during  
628 adolescent development in rats. *Endocrinology* **152**:629–38. doi:10.1210/en.2010-0658
- 629 Johnson DC, Casey BJ. 2014. Easy to remember, difficult to forget: The development of fear  
630 regulation. *Dev Cogn Neurosci*. doi:10.1016/j.dcn.2014.07.006
- 631 Kendig MD, Bowen MT, Kemp AH, McGregor IS. 2011. Predatory threat induces huddling in  
632 adolescent rats and residual changes in early adulthood suggestive of increased resilience.  
633 *Behav Brain Res* **225**:405–414. doi:10.1016/j.bbr.2011.07.058
- 634 Kessler RC, Berglund P, Demler O, Jin R, Merikangas KR, Walters EE. 2005. Lifetime Prevalence  
635 and Age-of-Onset Distributions of DSM-IV Disorders in the National Comorbidity Survey  
636 Replication. *Arch Gen Psychiatry* **62**:593. doi:10.1001/archpsyc.62.6.593
- 637 Knox D, George SA, Fitzpatrick CJ, Rabinak CA, Maren S, Liberzon I. 2012a. Single prolonged  
638 stress disrupts retention of extinguished fear in rats. *Learn Mem* **19**:43–9.  
639 doi:10.1101/lm.024356.111
- 640 Knox D, Nault T, Henderson C, Liberzon I. 2012b. Glucocorticoid receptors and extinction  
641 retention deficits in the single prolonged stress model. *Neuroscience* **223**:163–173.  
642 doi:10.1016/j.neuroscience.2012.07.047
- 643 Kohda K, Harada K, Kato K, Hoshino A, Motohashi J, Yamaji T, Morinobu S, Matsuoka N, Kato N.  
644 2007. Glucocorticoid receptor activation is involved in producing abnormal phenotypes of  
645 single-prolonged stress rats: A putative post-traumatic stress disorder model.  
646 *Neuroscience* **148**:22–33. doi:10.1016/j.neuroscience.2007.05.041

- 647 Kumar S, Hultman R, Hughes D, Michel N, Katz BM, Dzirasa K. 2014. Prefrontal cortex reactivity  
648 underlies trait vulnerability to chronic social defeat stress. *Nat Commun* **5**:4537.  
649 doi:10.1038/ncomms5537
- 650 Liberzon I, Krstov M, Young EA. 1997. Stress-restress: Effects on ACTH and fast feedback.  
651 *Psychoneuroendocrinology* **22**:443–453. doi:10.1016/S0306-4530(97)00044-9
- 652 Liberzon I, Ló Pez JF, Flagel SB, Vázquez DM, Young EA. 1999. Differential Regulation of  
653 Hippocampal Glucocorticoid Receptors mRNA and Fast Feedback: Relevance to Post-  
654 Traumatic Stress Disorder, *Journal of Neuroendocrinology*.
- 655 Lukkes JL, Mokin M V, Scholl JL, Forster GL. 2009. Adult rats exposed to early-life social isolation  
656 exhibit increased anxiety and conditioned fear behavior, and altered hormonal stress  
657 responses. *Horm Behav* **55**:248–56. doi:10.1016/j.yhbeh.2008.10.014
- 658 Matovic S, Ichiyama A, Igarashi H, Salter EW, Sunstrum JK, Wang XF, Henry M, Kuebler ES,  
659 Vernoux N, Martinez-Trujillo J, Tremblay M, Inoue W. 2020. Neuronal hypertrophy  
660 dampens neuronal intrinsic excitability and stress responsiveness during chronic stress. *J*  
661 *Physiol* **598**:2757–2773. doi:10.1113/JP279666
- 662 McEwen BS. 2007. Physiology and neurobiology of stress and adaptation: central role of the  
663 brain. *Physiol Rev* **87**:873–904. doi:10.1152/physrev.00041.2006
- 664 Meir Drexler S, Wolf OT. 2017. The role of glucocorticoids in emotional memory  
665 reconsolidation. *Neurobiol Learn Mem*. doi:10.1016/j.nlm.2016.11.008
- 666 Milad MR, Orr SP, Pitman RK, Rauch SL. 2005. Context modulation of memory for fear  
667 extinction in humans. *Psychophysiology* **42**:456–464. doi:10.1111/j.1469-  
668 8986.2005.00302.x

- 669 Milad MR, Pitman RK, Ellis CB, Gold AL, Shin LM, Lasko NB, Zeidan MA, Handwerker K, Orr SP,  
670 Rauch SL. 2009. Neurobiological Basis of Failure to Recall Extinction Memory in  
671 Posttraumatic Stress Disorder. *Biol Psychiatry* **66**:1075–1082.  
672 doi:10.1016/j.biopsych.2009.06.026
- 673 Milad MR, Quirk GJ. 2002. Neurons in medial prefrontal cortex signal memory for fear  
674 extinction. *Nature* **420**:70–74. doi:10.1038/nature01138
- 675 Milad MR, Rauch SL, Pitman RK, Quirk GJ. 2006. Fear extinction in rats: Implications for human  
676 brain imaging and anxiety disorders. *Biol Psychol* **73**:61–71.  
677 doi:10.1016/j.biopsycho.2006.01.008
- 678 Moore NLT, Gauchan S, Genovese RF. 2014. Adolescent traumatic stress experience results in  
679 less robust conditioned fear and post-extinction fear cue responses in adult rats.  
680 *Pharmacol Biochem Behav* **120**:17–24. doi:10.1016/j.pbb.2014.01.011
- 681 Negrón-Oyarzo I, Pérez MÁ, Terreros G, Muñoz P, Dagnino-Subiabre A. 2014. Effects of chronic  
682 stress in adolescence on learned fear, anxiety, and synaptic transmission in the rat  
683 prelimbic cortex. *Behav Brain Res* **259**:342–353. doi:10.1016/j.bbr.2013.11.001
- 684 Novick AM, Mears M, Forster GL, Lei Y, Tejani-Butt SM, Watt MJ. 2016. Adolescent social defeat  
685 alters N-methyl-d-aspartic acid receptor expression and impairs fear learning in adulthood.  
686 *Behav Brain Res* **304**:51–59. doi:10.1016/j.bbr.2016.02.013
- 687 Oitzl MS, Champagne DL, van der Veen R, de Kloet ER. 2010. Brain development under stress:  
688 Hypotheses of glucocorticoid actions revisited. *Neurosci Biobehav Rev* **34**:853–866.  
689 doi:10.1016/j.neubiorev.2009.07.006
- 690 Öngür D, Price JL. 2000. The organization of networks within the orbital and medial prefrontal

- 691 cortex of rats, monkeys and humans. *Cereb Cortex*. doi:10.1093/cercor/10.3.206
- 692 Ordoñez Sanchez E, Bavley CC, Deutschmann AU, Carpenter R, Peterson DR, Karbalaee R,  
693 Flowers J, Rogers CM, Langrehr MG, Ardekani CS, Famularo ST, Bongiovanni AR, Knouse  
694 MC, Floresco SB, Briand LA, Wimmer ME, Bangasser DA. 2021. Early life adversity  
695 promotes resilience to opioid addiction-related phenotypes in male rats and sex-specific  
696 transcriptional changes. *Proc Natl Acad Sci* **118**:e2020173118.  
697 doi:10.1073/pnas.2020173118
- 698 Ozbay F, Johnson DC, Dimoulas E, Morgan CA, Charney D, Southwick S. 2007. Social support and  
699 resilience to stress: from neurobiology to clinical practice. *Psychiatry (Edgmont)* **4**:35–40.
- 700 Paus T, Keshavan M, Giedd JN. 2008. Why do many psychiatric disorders emerge during  
701 adolescence? *Nat Rev Neurosci* **9**:947–957. doi:10.1038/nrn2513
- 702 Paxinos G, Watson C. 2007. The rat brain in stereotaxic coordinates. Elsevier.
- 703 Piggott VM, Bosse KE, Lisieski MJ, Strader JA, Stanley JA, Conti AC, Ghoddoussi F, Perrine SA.  
704 2019. Single-prolonged stress impairs prefrontal cortex control of amygdala and striatum  
705 in rats. *Front Behav Neurosci* **13**. doi:10.3389/fnbeh.2019.00018
- 706 Rauch SL, Shin LM, Phelps EA. 2006. Neurocircuitry Models of Posttraumatic Stress Disorder and  
707 Extinction: Human Neuroimaging Research-Past, Present, and Future. *Biol Psychiatry*.  
708 doi:10.1016/j.biopsych.2006.06.004
- 709 Riboni FV, Belzung C. 2017. Stress and psychiatric disorders: from categorical to dimensional  
710 approaches. *Curr Opin Behav Sci*. doi:10.1016/j.cobeha.2016.12.011
- 711 Ricon T, Toth E, Leshem M, Braun K, Richter-Levin G. 2012. Unpredictable chronic stress in  
712 juvenile or adult rats has opposite effects, respectively, promoting and impairing

- 713 resilience. *Stress* **15**:11–20. doi:10.3109/10253890.2011.572207
- 714 Romeo RD. 2015. Perspectives on stress resilience and adolescent neurobehavioral function.
- 715 *Neurobiol Stress*. doi:10.1016/j.ynstr.2014.11.001
- 716 Russo SJ, Murrough JW, Han MH, Charney DS, Nestler EJ. 2012. Neurobiology of resilience. *Nat*
- 717 *Neurosci*. doi:10.1038/nn.3234
- 718 Sareen J. 2014. Posttraumatic stress disorder in adults: Impact, comorbidity, risk factors, and
- 719 treatment. *Can J Psychiatry* **59**:460–467. doi:10.1177/070674371405900902
- 720 Schmidt M. 2011. Animal models for depression and the mismatch hypothesis of disease.
- 721 *Psychoneuroendocrinology* **36**:330–338. doi:10.1016/j.psyneuen.2010.07.001
- 722 Shah MM. 2014. Cortical HCN channels: Function, trafficking and plasticity. *J Physiol* **592**:2711–
- 723 2719. doi:10.1113/jphysiol.2013.270058
- 724 Southwick SM, Charney DS. 2012. The Science of Resilience: Implications for the Prevention and
- 725 Treatment of Depression. *Science (80- )* **338**:79–82. doi:10.1126/science.1222942
- 726 Suo L, Zhao L, Si J, Liu J, Zhu W, Chai B, Zhang Y, Feng J, Ding Z, Luo Y, Shi H, Shi J, Lu L. 2013.
- 727 Predictable chronic mild stress in adolescence increases resilience in adulthood.
- 728 *Neuropsychopharmacology* **38**:1387–1400. doi:10.1038/npp.2013.67
- 729 Ting JT, Daigle TL, Chen Q, Feng G. 2014. Acute brain slice methods for adult and aging animals:
- 730 Application of targeted patch clamp analysis and optogenetics. *Methods Mol Biol*
- 731 **1183**:221–242. doi:10.1007/978-1-4939-1096-0\_14
- 732 Tost H, Champagne FA, Meyer-Lindenberg A. 2015. Environmental influence in the brain,
- 733 human welfare and mental health. *Nat Neurosci*. doi:10.1038/nn.4108
- 734 Tsoory MM, Guterman A, Richter-Levin G. 2010. “Juvenile stress” alters maturation-related

- 735 changes in expression of the neural cell adhesion molecule L1 in the limbic system:  
736 Relevance for stress-related psychopathologies. *J Neurosci Res* **88**:369–380.  
737 doi:10.1002/jnr.22203
- 738 Vyas A, Mitra R, Shankaranarayana Rao BS, Chattarji S. 2002. Chronic stress induces contrasting  
739 patterns of dendritic remodeling in hippocampal and amygdaloid neurons. *J Neurosci*  
740 **22**:6810–8. doi:20026655
- 741 Wen L, Han F, Shi Y. 2015. Changes in the Glucocorticoid Receptor and Ca<sup>2+</sup>/Calreticulin-  
742 Dependent Signalling Pathway in the Medial Prefrontal Cortex of Rats with Post-traumatic  
743 Stress Disorder. *J Mol Neurosci* **56**:24–34. doi:10.1007/s12031-014-0464-7
- 744 Wilkin MM, Waters P, McCormick CM, Menard JL. 2012. Intermittent physical stress during  
745 early- and mid-adolescence differentially alters rats' anxiety- and depression-like behaviors  
746 in adulthood. *Behav Neurosci* **126**:344–360. doi:10.1037/a0027258
- 747 Wulsin AC, Wick-Carlson D, Packard BA, Morano R, Herman JP. 2016. Adolescent chronic stress  
748 causes hypothalamo-pituitary-adrenocortical hypo-responsiveness and depression-like  
749 behavior in adult female rats. *Psychoneuroendocrinology* **65**:109–17.  
750 doi:10.1016/j.psyneuen.2015.12.004
- 751 Yee N, Schwarting RKW, Fuchs E, Wöhr M. 2012. Juvenile stress potentiates aversive 22-kHz  
752 ultrasonic vocalizations and freezing during auditory fear conditioning in adult male rats.  
753 *Stress* **15**:533–544. doi:10.3109/10253890.2011.646348
- 754  
755
